# Supplementary material
Source: publisher site journal article supplement (https://www.spandidos-publications.com/8531/downloadSupplementary)
Supplement: Supplementary file 1 [file downloadSupplementary]

## Sheet: Supplementary Table 2
Table SII. Top 200 DEGs (PpIX-low signature).
Symbol	logFC	AveExpr
MT1G	-2.4351	4.00309
GPNMB	-2.02343	2.46261
C1S	-1.84111	2.23775
FOSB	-1.83902	4.01551
SPOCK2	-1.79986	3.87374
CCR7	-1.67054	2.19478
DAPL1	-1.61956	1.37385
IFIT1	-1.58171	1.91632
NUPR1	-1.5533	3.0716
SELENOP	-1.5232	2.78779
CRYGS	-1.52034	2.16774
APOE	-1.51979	3.07196
CLDN4	-1.5197	6.91775
SLCO4A1-AS1	1.48325	4.76007
GEM	-1.47986	4.42447
HES5	1.47975	4.96385
BBOX1	-1.4681	3.13469
SERPINA3	-1.44841	4.50605
LOC105374643	1.44539	0.458208
PDE2A	-1.39841	2.06197
BST2	-1.39148	3.84992
PAQR6	-1.38422	6.40417
SLPI	-1.36728	1.10744
OASL	-1.3604	1.23086
SPARCL1	-1.32865	1.9826
NTRK2	-1.32261	2.57274
PPP1R3C	-1.30826	5.0298
SCRG1	-1.30015	3.83736
KANK4	-1.29997	1.59624
ANGPTL4	-1.28798	1.86364
NMU	1.27939	2.41041
MAFF	-1.27121	3.07878
APC2	-1.25941	2.60661
NT5E	1.25802	4.31177
IFITM1	-1.22387	1.78677
VTRNA1-3	-1.2189	4.99554
BIRC5	1.19707	6.83075
NOS2	1.18924	1.96913
C1ORF54	-1.18838	3.40002
GPM6A	-1.18643	2.05665
AQP4	-1.18287	1.97992
SLCO4A1	1.17726	2.09284
SPSB1	-1.15833	1.5629
NDRG4	-1.15176	5.09606
CYTOR	-1.13734	5.70079
VAV3	1.13633	2.33751
NRARP	1.11815	5.57032
DRD2	1.1123	1.27685
RASAL3	-1.10419	1.20335
CDH1	-1.09975	1.20017
IL1B	-1.09796	0.927956
NFATC2	-1.09795	2.58698
FOXM1	1.0962	2.23412
PRECSIT	-1.09176	2.6944
SRPX	1.0898	5.21064
SOCS1	-1.08856	2.48582
CCNB2	1.0871	4.57817
DKK3	-1.08678	4.48282
NCEH1	-1.08052	5.63606
NTSR1	1.07483	2.10583
SLC4A4	-1.06988	1.80336
GADL1	1.04578	0.509644
C11ORF96	-1.03436	5.7505
NUAK1	1.03292	4.32686
IL6R	-1.02885	2.87866
ECM1	1.02578	1.15561
ATP1B2	-1.02402	5.5822
TMEM262	-1.01963	1.65161
WEE1	-1.01775	6.4025
CTSV	1.01712	2.70349
QPRT	-1.01614	2.11584
CLEC18B	-1.01041	3.00036
NMB	1.00948	5.72937
ITGA3	1.0071	2.75812
MAOB	-0.999011	3.45599
TXNIP	0.998158	3.33719
GADD45B	-0.994282	4.3337
LINC01630	0.988441	2.77362
HEYL	0.984164	1.09012
BTBD17	-0.983653	1.17402
ATF3	-0.983521	5.46083
CADPS	-0.98324	2.22296
GATM	-0.980478	5.96632
MT1H	-0.980272	1.14515
RHOB	-0.978607	3.68804
C1R	-0.97332	5.34284
DHRS3	-0.971495	0.879642
C12ORF75	0.969819	1.72368
HEY1	0.968518	4.98058
MAPT	-0.966728	2.99509
MT1F	-0.962061	5.22207
MIR100HG	-0.960762	3.35916
TROAP	0.960298	1.8357
FAM189A1	0.959597	2.09023
TGFBI	0.95938	1.81244
HMGB3P1	0.95808	3.91428
CDC20	0.957517	1.9792
SNORA2C	-0.957281	4.11274
TPST1	-0.954493	5.10494
ANOS1	-0.951632	2.35023
TSC22D3	-0.950437	5.53353
SH2B2	0.950374	3.54495
LGALS1	0.948714	10.0945
FRMD3	-0.947881	4.28546
GGH	0.947342	6.10328
PRKCQ-AS1	0.943748	2.59865
MLC1	-0.94116	7.44782
MLF1	-0.940452	4.369
SGMS2	-0.934402	1.58086
DCLK1	-0.932005	2.31304
BCL3	0.930825	5.09579
RN7SK	-0.927204	9.39149
CCDC103	0.924909	1.42466
TRIB1	-0.921999	7.69498
MDGA1	0.920478	1.25959
ADA	0.920286	5.91005
TUBA4A	-0.919817	3.17534
CHI3L1	-0.919767	7.75355
IL6R-AS1	-0.916901	0.990092
RMRP	-0.915312	4.7852
NFIA	-0.915081	1.78013
FAM107A	-0.913267	1.34694
FOSL1	-0.909478	3.43008
NEDD9	-0.909373	4.2148
SNORA54	-0.908108	2.84244
NAMPT	-0.902925	4.96487
RPS27	-0.898867	1.62773
MAN1C1	-0.898858	4.82659
CASC15	-0.896844	1.509
DENND11	0.896613	3.09353
RGS2	-0.893212	7.82143
PELI1	-0.891359	4.52177
PDE4DIP	-0.890635	2.10429
RNASE1	-0.881099	1.90152
OLFM2	-0.880106	0.74612
RGS20	-0.878801	2.76961
LYPD6	0.878249	0.918435
RMI2	0.878238	3.43434
SGK1	-0.876492	6.71986
PTTG2	0.876466	4.46649
CRYAB	0.875765	4.24615
PLA2G7	0.873835	2.22329
OSER1	-0.87341	5.23059
FZD5	0.871167	1.77292
ARC	-0.868724	2.80909
PLAAT4	-0.863594	2.83576
MT1M	-0.86233	4.50054
CDKN2AIPNL	0.861624	2.6186
GPAT3	-0.85888	5.05495
ALDH1A1	-0.858833	0.747861
NT5DC2	0.85631	2.27357
SPRY1	0.854653	6.21807
LINC00513	-0.854444	0.72049
IFITM4P	-0.854355	3.68921
MEG3	0.852205	3.28645
MALAT1	-0.851507	6.15324
ADGRG1	-0.849497	7.2666
KLF2	-0.847104	6.52746
PRIM1	0.844672	1.91637
DACT1	0.844466	3.25984
NGEF	0.842903	5.21283
PTTG1	0.839946	6.5333
RNU11	-0.839565	3.59582
HMGN2	0.839565	6.94911
RPS2	0.839054	1.51877
HDHD5-AS1	-0.838458	1.91977
CCDC34	0.838008	2.38135
SNORD114-15	-0.835778	2.06574
BMP2	-0.835178	3.09535
TRPM3	0.834389	1.55908
CALB1	0.833876	5.53706
EMID1	-0.832462	1.59879
ARHGEF4	-0.830914	2.09277
DUSP14	-0.829681	5.17727
HEPACAM	-0.829035	4.71074
METTL7A	-0.828585	2.97917
SNX7	0.827365	2.81489
NRP1	0.826662	3.02733
H2AC19	-0.824277	5.62773
AHNAK2	-0.823327	1.81044
VIM-AS1	-0.820537	1.39109
DCPS	0.820458	4.27187
CYBRD1	-0.820064	4.1444
IQGAP3	0.818865	3.31246
CTSF	-0.817013	4.98033
MIR1915HG	0.81575	1.97352
SEZ6L2	-0.814827	4.28817
ITGA7	0.814445	5.17376
PODXL	0.813721	5.26862
SNORA16A	-0.813257	5.43859
HMGN1	0.812261	5.32924
CSPG5	-0.812251	4.1738
AUTS2	0.811493	2.52142
KLF6	-0.811209	6.77851
ADAM19	0.809658	4.88138
ELK3	-0.809347	1.37447
IGF2BP3	0.806209	5.92488
C6ORF141	-0.804614	3.35939
MPRIP	-0.804121	2.71344
MYZAP	-0.803819	1.43815
Notes: List of the 200 genes with the highest absolute log₂ fold-change values in migratory PpIX-low cells compared to the other three subpopulations. These genes were used for heatmap visualization (Fig. 3b) and to construct a TCGA-based prognostic signature (Fig. 3d).
